# Supplementary material
Source: ML conference proceedings conference paper supplement (https://proceedings.mlr.press/v130/shi21b.html)
Supplement: Supplementary file 1 [file shi21b-supp.pdf]

---

# A Deterministic Streaming Sketch for Ridge Regression Supplementary Materials

---

## A OTHER VARIANCE BOUNDS FOR RISK

We provide two different bounds for variance  $\mathcal{V}(\hat{\mathbf{x}}_\gamma)$  that are not strictly comparable with the one provided in Lemma 3.

**Lemma 6.** *Considering the data generation model and the risk described in Lemma 3. The variance of the approximate solution  $\hat{\mathbf{x}}_\gamma = (\mathbf{C}^\top \mathbf{C} + \gamma \mathbf{I})^{-1} \mathbf{A}^\top \mathbf{b}$  satisfy*

$$\mathcal{V}(\hat{\mathbf{x}}_\gamma) \leq \left( 1 + \frac{1}{\gamma} \|\mathbf{A}\|_2^2 \|\mathbf{A}^\top \mathbf{A} - \mathbf{C}^\top \mathbf{C}\|_2^2 \|\mathbf{A}^\dagger\|_2^2 \right) \mathcal{V}(\mathbf{x}_\gamma)$$

*Proof.*

$$\begin{aligned} \mathcal{V}(\hat{\mathbf{x}}_\gamma) &= \mathbb{E}_{\mathbf{Z}} [\|\mathbf{A}(\hat{\mathbf{x}}_\gamma - \mathbb{E}_{\mathbf{Z}}[\hat{\mathbf{x}}_\gamma])\|^2] \\ &= \mathbb{E}_{\mathbf{Z}} [\|\mathbf{A}((\mathbf{C}^\top \mathbf{C} + \gamma \mathbf{I})^{-1} \mathbf{A}^\top \mathbf{s} \mathbf{Z})\|^2] \\ &= s^2 \|\mathbf{A}(\mathbf{C}^\top \mathbf{C} + \gamma \mathbf{I})^{-1} \mathbf{A}^\top\|_F^2 \\ &= s^2 \|\mathbf{A} \left( (\hat{\mathbf{K}} + \gamma \mathbf{I})^{-1} - (\mathbf{K} + \gamma \mathbf{I})^{-1} + (\mathbf{K} + \gamma \mathbf{I})^{-1} \right) \mathbf{A}^\top\|_F^2 \\ &= s^2 \|\mathbf{A} \left( (\hat{\mathbf{K}} + \gamma \mathbf{I})^{-1} (\mathbf{K} - \hat{\mathbf{K}}) (\mathbf{K} + \gamma \mathbf{I})^{-1} + (\mathbf{K} + \gamma \mathbf{I})^{-1} \right) \mathbf{A}^\top\|_F^2 \\ &= s^2 \|\mathbf{A} \left( (\hat{\mathbf{K}} + \gamma \mathbf{I})^{-1} (\mathbf{K} - \hat{\mathbf{K}}) + \mathbf{I} \right) (\mathbf{K} + \gamma \mathbf{I})^{-1} \mathbf{A}^\top\|_F^2 \\ &= s^2 \|\mathbf{A} \left( (\hat{\mathbf{K}} + \gamma \mathbf{I})^{-1} (\mathbf{K} - \hat{\mathbf{K}}) + \mathbf{I} \right) \mathbf{A}^+ \mathbf{A} (\mathbf{K} + \gamma \mathbf{I})^{-1} \mathbf{A}^\top\|_F^2 \\ &\leq s^2 \|\mathbf{A} \left( (\hat{\mathbf{K}} + \gamma \mathbf{I})^{-1} (\mathbf{K} - \hat{\mathbf{K}}) + \mathbf{I} \right) \mathbf{A}^+\|_2^2 \|\mathbf{A} (\mathbf{K} + \gamma \mathbf{I})^{-1} \mathbf{A}^\top\|_F^2 \\ &= \|\mathbf{A} (\hat{\mathbf{K}} + \gamma \mathbf{I})^{-1} (\mathbf{A}^\top \mathbf{A} - \mathbf{C}^\top \mathbf{C}) \mathbf{A}^+ + \mathbf{I}\|_2^2 \mathcal{V}(\mathbf{x}_\gamma) \\ &\leq \left( 1 + \frac{1}{\gamma} \|\mathbf{A}\|_2^2 \|\mathbf{A}^\top \mathbf{A} - \mathbf{C}^\top \mathbf{C}\|_2^2 \|\mathbf{A}^\dagger\|_2^2 \right) \mathcal{V}(\mathbf{x}_\gamma) \end{aligned}$$

□

**Lemma 7.** *Considering the data generation model and the risk described in Lemma 3. The variance of the approximate solution  $\hat{\mathbf{x}}_\gamma = (\mathbf{C}^\top \mathbf{C} + \gamma \mathbf{I})^{-1} \mathbf{A}^\top \mathbf{b}$  satisfy*

$$\mathcal{V}(\hat{\mathbf{x}}_\gamma) \leq \frac{1}{1 - \|\mathbf{A}^+\|_2^2 \|(\mathbf{C}^\top \mathbf{C} - \mathbf{A}^\top \mathbf{A})\|_2} \mathcal{V}(\mathbf{x}_\gamma)$$

*Proof.* The proof Follows the strategy used by Wang et al. (2018) for the Hessian Sketch variance bound.

$$\begin{aligned}
 \mathcal{V}(\hat{\mathbf{x}}_\gamma) &= \mathbb{E}_Z [\|\mathbf{A}(\hat{\mathbf{x}}_\gamma - \mathbb{E}_Z[\hat{\mathbf{x}}_\gamma])\|^2] \\
 &= \mathbb{E}_Z [\|\mathbf{A}((\mathbf{C}^\top \mathbf{C} + \gamma \mathbf{I})^{-1} \mathbf{A}^\top s \mathbf{Z})\|^2] \\
 &= s^2 \|\mathbf{A}(\mathbf{C}^\top \mathbf{C} + \gamma \mathbf{I})^{-1} \mathbf{A}^\top\|_F^2 \\
 &= s^2 \|(\mathbf{A}^{+\top} \mathbf{C}^\top \mathbf{C} \mathbf{A}^+ + \gamma (\mathbf{A}^\top \mathbf{A})^{-1})^{-1}\|_F^2 \\
 &\leq \frac{1}{1 - \|\mathbf{A}^+\|^2 \|(\mathbf{C}^\top \mathbf{C} - \mathbf{A}^\top \mathbf{A})\|_2} s^2 \|(\mathbf{I} + \gamma (\mathbf{A}^\top \mathbf{A})^{-1})^{-1}\|_F^2 \\
 &= \frac{1}{1 - \|\mathbf{A}^+\|^2 \|(\mathbf{C}^\top \mathbf{C} - \mathbf{A}^\top \mathbf{A})\|_2} s^2 \|\mathbf{A}(\mathbf{A}^\top \mathbf{A} + \gamma \mathbf{I})^{-1} \mathbf{A}^\top\|_F^2 \\
 &= \frac{1}{1 - \|\mathbf{A}^+\|^2 \|(\mathbf{C}^\top \mathbf{C} - \mathbf{A}^\top \mathbf{A})\|_2} \mathcal{V}(\mathbf{x}_\gamma).
 \end{aligned}$$

The inequality follows

$$\begin{aligned}
 &\|\mathbf{A}^{+\top} \mathbf{C}^\top \mathbf{C} \mathbf{A}^+ - \mathbf{I}\|_2 \\
 &= \|\mathbf{A}^{+\top} \mathbf{C}^\top \mathbf{C} \mathbf{A}^+ - \mathbf{A}^{+\top} \mathbf{A}^\top \mathbf{A} \mathbf{A}^+\|_2 \\
 &= \|\mathbf{A}^{+\top} (\mathbf{C}^\top \mathbf{C} - \mathbf{A}^\top \mathbf{A}) \mathbf{A}^+\|_2 \\
 &\leq \|\mathbf{A}^+\|^2 \|(\mathbf{C}^\top \mathbf{C} - \mathbf{A}^\top \mathbf{A})\|_2.
 \end{aligned}$$

□
